# Supplementary material
Source: MDPI journal article supplement (https://www.mdpi.com/2071-1050/9/1/33)
Supplement: s1 [file s1]

# Supplementary Materials: Exploring Socio-Technical Features of Green Interior Design of Residential Buildings: Indicators, Interdependence and Embeddedness

Yan Ning, Yadi Li, Shuangshuang Yang and Chuanjing Ju

**Annex 1.** Code and regulations of relevance to green interior design for residential building at the national and industrial level (1).

| Aspect             | Time       | Rules, Codes, and Regulations                                                                                  | Enacting Organizations |
|--------------------|------------|----------------------------------------------------------------------------------------------------------------|------------------------|
| Space performance  | 2009/06/01 | Function and dimension series of bathroom in housing (GB/T11977-2008)                                          | AQSIQ                  |
| IEQ                | Acoustic   | 2008/10/01 Environmental quality standard for noise (GB 3096-2008)                                             | MEP & AQSIQ            |
|                    |            | 2011/06/01 Code for design of sound insulation of civil building (GB50118-2010)                                | MOHURD & AQSIQ         |
|                    | Thermal    | 2012/10/01 Evaluation standard for indoor thermal environment in civil building (GB/T 50785-2012)              | MOHURD & AQSIQ         |
|                    | IAQ        | 1998/12/01 Hygienic standard for carbon dioxide in indoor air (GB/T 17094-1997)                                | MOH                    |
|                    |            | 1998/12/02 Hygienic Standard for Inhalable Particulate Matter in Indoor Air (GB/T 17095-1997)                  | CSBTS & MOH            |
|                    |            | 2003/03/01 Indoor air quality standard (GB/T 18883-2002)                                                       | AQSIQ & MOH & MEP      |
| Energy efficiency  | 2010/07/01 | Standard for energy efficiency test of residential buildings (JGJ/T 132-2009)                                  | MOHURD                 |
|                    | 2010/08/01 | Design standard for energy efficiency of residential buildings in severe cold and cold zone (JGJ26-2010)       | MOHURD                 |
|                    | 2010/08/01 | Design standard for energy efficiency of residential building in hot summer and cold winter zone (JGJ134-2010) | MOHURD                 |
|                    | 2013/03/01 | Technical specification for energy efficiency retrofitting of existing residential buildings (JGJ/T129-2012)   | MOHURD                 |
|                    | 2013/04/01 | Design standard for energy efficiency of residential buildings in hot summer warm winter zone (JGJ75-2012)     | MOHURD                 |
|                    | 2013/05/01 | Design standard for energy efficiency of rural residential buildings (GB/T 50824-2013)                         | MOHURD                 |
|                    | 2003/03/01 | Code of design for building reclaimed water system (GB 50336-2002)                                             | MOC & AQSIQ            |
| Water conservation | 2003/09/01 | Code for design of building water supply and drainage (GB 50015-2003 (2009 edition))                           | MOC & AQSIQ            |
|                    | 2007/04/01 | Engineering technical code for rain utilization in building and sub-district (GB 50400-2006)                   | MOC & AQSIQ            |
|                    | 2010/12/01 | Standard for water saving design in civil building (GB 50555-2010)                                             | MOHURD                 |
|                    | 2014/08/01 | Domestic water saving devices (CJ164-2014)                                                                     | MOHURD                 |

## Annex 1. Cont.

| Aspect                 | Time       | Rules, Codes, and Regulations                                                                                                                      | Enacting Organizations |
|------------------------|------------|----------------------------------------------------------------------------------------------------------------------------------------------------|------------------------|
| Material saving        | 2009/03/01 | Steel members of assembled residential buildings with light-weight steel framing (JG/T 182-2008)                                                   | MOHURD                 |
|                        | 2009/04/01 | Bathroom unit (GB/T 13095-2008)                                                                                                                    | AQSIQ                  |
|                        | 2012/01/01 | Bathroom unit for housing (JG/T 183-2011)                                                                                                          | MOHURD                 |
|                        | 2012/01/01 | Kitchen for housing (JG/T 184-2011)                                                                                                                | MOHURD                 |
|                        | 2016/01/01 | Standard for assessment of industrialized building (GB/T 51129-2015)                                                                               | MOHURD & AQSIQ         |
| Materials and finishes | 2002/01/01 | Indoor decorating and refurbishing materials—Limit of formaldehyde emission of wood-based panels and finishing products (GB 18580-2001)            | AQSIQ                  |
|                        | 2002/01/01 | Indoor decorating and refurbishing materials—Limit of harmful substances of wood based furniture (GB 18584-2001)                                   | AQSIQ                  |
|                        | 2002/01/01 | Indoor decorating and refurbishing materials—Limit of harmful substances of wallpapers (GB 18585-2001)                                             | AQSIQ                  |
|                        | 2002/01/01 | Indoor decorating and refurbishing materials—Limit of harmful substances of polyvinyl chloride floor coverings (GB 18586-2001)                     | AQSIQ                  |
|                        | 2002/01/01 | Indoor decorating and refurbishing materials—Limitations of harmful substances emitted from carpets, carpet cushions and adhesives (GB 18587-2001) | AQSIQ                  |
|                        | 2002/01/01 | Limit of ammonia emitted from the concrete admixtures (GB 18588-2001)                                                                              | AQSIQ                  |
|                        | 2006/06/01 | Gaskets for doors and windows of buildings (JG/T 187-2006)                                                                                         | MOC                    |
|                        | 2006/06/01 | The technical requirement for environmental labeling products—Water based coatings (HJ/T 201-2005)                                                 | MEP                    |
|                        | 2006/06/01 | Technical requirement for environmental labeling products—Asbestos free building materials (HJ/T206-2005)                                          | MEP                    |
|                        | 2006/06/01 | Technical Requirement for Environmental Labeling Products—Adhesives (HJ/T 220-2005)                                                                | MEP                    |
|                        | 2007/02/01 | The Technical Requirement for Environmental Labeling Products—Furniture (HJ/T 303-2006)                                                            | MEP                    |
|                        | 2010/06/01 | Indoor decorating and refurbishing materials—Limit of harmful substances of solvent coatings for woodenware (GB 18581-2009)                        | AQSIQ                  |
|                        | 2008/04/01 | Technical requirement for environmental labeling products—Solvent-based wood coatings for indoor decoration and refurbishing (HJ/T 414-2007)       | MEP                    |
|                        | 2008/10/01 | Indoor decorating and refurbishing materials—Limit of harmful substances of interior architectural coatings (GB 18582-2008)                        | AQSIQ                  |
|                        | 2009/05/01 | General Requirements for Manufacture, Application and Label of Adhesives for Decorating and Refurbishing (GB/T 22377-2008)                         | AQSIQ                  |
|                        | 2009/09/01 | Indoor decorating and refurbishing materials—Limit of harmful substances of adhesives (GB 18583-2008)                                              | AQSIQ                  |

## Annex 1. Cont.

| Aspect                 | Time       | Rules, Codes, and Regulations                                                                                               | Enacting Organizations |
|------------------------|------------|-----------------------------------------------------------------------------------------------------------------------------|------------------------|
| Materials and finishes | 2010/01/01 | Metal and metal-composite ceilings (GB/T 23444-2009)                                                                        | AQSIQ                  |
|                        | 2010/02/01 | Indoor decorating and refurbishing solvent-based alkyd coatings for woodenware (GB/T 23995-2009)                            | AQSIQ                  |
|                        | 2010/02/01 | Solvent Metal Panel Coatings for Indoor Decorating and Refurbishing (GB/T 23996-2009)                                       | AQSIQ                  |
|                        | 2010/02/01 | Solvent-thinned polyurethane wood coatings for indoor decorating and refurbishing (GB/T 23997-2009)                         | AQSIQ                  |
|                        | 2010/02/01 | Indoor decorating and refurbishing solvent-based nitrocellulose coatings for woodenware (GB/T 23998-2009)                   | AQSIQ                  |
|                        | 2010/02/01 | Water based coatings for woodenware for indoor decorating and refurbishing (GB/T 23999-2009)                                | AQSIQ                  |
|                        | 2010/06/01 | Indoor decorating and refurbishing materials—Limit of harmful substances of water based woodenware coatings (GB 24410-2009) | AQSIQ                  |
|                        | 2010/07/01 | Technical requirement for environmental labeling products—Wood based panels and finishing products (HJ571-2010)             | MEP                    |
|                        | 2011/07/01 | Limits of radionuclides in building materials (GB 6566-2010)                                                                | AQSIQ                  |
|                        | 2012/06/01 | Natural resin coatings for woodenware for indoor decorating and refurbishing (GB/T 27811-2011)                              | MOHURD                 |
| New technologies       | 2006/01/01 | Technical code for ground-source heat pump system (GB 50366-2005)                                                           | MOC & AQSIQ            |
|                        | 2012/05/01 | Technical code for passive solar buildings (JGJ/T 267-2012)                                                                 | MOHURD                 |
|                        | 2015/11/01 | Standard for design of intelligent building (GB/T 50314-2015)                                                               | MOHURD & AQSIQ         |

Note: AQSIQ: General Administration of Quality Supervision, Inspection and Quarantine of the People's Republic of China; MEP: Ministry of Environmental Protection of the People's Republic of China; MOHURD: Ministry of Housing and Urban-Rural Development of the people's Republic of China; MOH: The ministry of health of the People's Republic of China; MOC: Ministry of Construction of the people's Republic of China; CSBTS: China State Bureau of Technical Supervision.

**Annex 2.** Code and regulations of relevance to green interior design for residential building at the national and industrial level (2).

|                                                                       | SP | IEQ      |          |         |     | EE | WC | MS | MF | NT |
|-----------------------------------------------------------------------|----|----------|----------|---------|-----|----|----|----|----|----|
|                                                                       |    | Acoustic | Lighting | Thermal | IAQ |    |    |    |    |    |
| Code for designs of civil buildings (GB50352-2005)                    | ✓  | ✓        | ✓        | ✓       | ✓   |    |    |    |    |    |
| Residential building code (GB50368-2005)                              | ✓  | ✓        | ✓        | ✓       | ✓   |    |    |    |    |    |
| Code for design of residential building (GB50096-2011)                | ✓  | ✓        | ✓        | ✓       | ✓   |    |    |    |    |    |
| Code for design of the residential interior decoration (JGJ 367-2015) | ✓  | ✓        | ✓        | ✓       | ✓   |    |    |    |    | ✓  |
| Standard for daylighting design of buildings (GB 50033-2013)          |    |          | ✓        |         |     | ✓  |    |    |    |    |

## Annex 2. Cont.

|                                                                                                                               | SP | IEQ      |          |         |     | EE | WC | MS | MF | NT |
|-------------------------------------------------------------------------------------------------------------------------------|----|----------|----------|---------|-----|----|----|----|----|----|
|                                                                                                                               |    | Acoustic | Lighting | Thermal | IAQ |    |    |    |    |    |
| Standard for lighting design of buildings (GB 50034-2013)                                                                     |    |          | ✓        |         |     | ✓  |    |    |    |    |
| Design code for heating ventilation and air conditioning of civil buildings (GB50736-2012)                                    |    | ✓        |          | ✓       | ✓   |    |    |    |    |    |
| Code for design of heating ventilation and air conditioning (GB 50019-2015)                                                   |    | ✓        |          | ✓       | ✓   |    |    |    |    |    |
| Code for indoor environmental pollution control of civil building engineering (GB50325-2010 (2013))                           |    |          |          |         | ✓   |    |    |    | ✓  |    |
| Standard for modular coordination of residential buildings (GB/T 50100-2001)                                                  | ✓  |          |          |         |     |    |    | ✓  |    |    |
| Technical requirement for environmental labeling products Building decoration engineering (HJ 440-2008)                       | ✓  | ✓        | ✓        | ✓       | ✓   | ✓  |    | ✓  | ✓  |    |
| Technical guideline for assessment for green building (199-2005)                                                              |    | ✓        | ✓        | ✓       | ✓   | ✓  | ✓  | ✓  | ✓  | ✓  |
| Technical requirement for environmental labeling products Eco-housing (HJ/T351-2007)                                          |    | ✓        | ✓        | ✓       | ✓   | ✓  | ✓  |    | ✓  |    |
| Complementary illustration for technical guideline for assessment for green building (Planning and design section) (113-2008) |    |          |          | ✓       |     | ✓  | ✓  |    |    |    |
| Assessment standard for green building (Hong Kong Version) (CSUS/GBC 1-2010)                                                  |    | ✓        | ✓        | ✓       | ✓   | ✓  | ✓  | ✓  |    |    |
| Code for green design of civil buildings (JGJ/T229-2010)                                                                      | ✓  | ✓        | ✓        | ✓       | ✓   |    | ✓  | ✓  | ✓  | ✓  |
| Technical guideline for green affordable houses (195-2013)                                                                    |    | ✓        | ✓        | ✓       | ✓   | ✓  | ✓  | ✓  |    |    |
| Technical guideline for assessment of green super tall building (76-2012)                                                     |    | ✓        | ✓        | ✓       | ✓   | ✓  | ✓  | ✓  | ✓  |    |
| Assessment standard for green building (GB/T 50378-2014)                                                                      |    | ✓        | ✓        | ✓       | ✓   | ✓  | ✓  | ✓  | ✓  | ✓  |

Note: SP: space performance; IEQ: indoor environmental quality; IAQ: indoor air quality; EE: Energy efficiency; WC: water conservation; MS: material saving; MF: material and finishes; NT: new technologies.

**Annex 3.** Code and regulations of relevance to green interior design for residential building in Jiangsu province (1).

| Aspect             | Time       | Rules, Codes, and Regulations                                                                                                     | Enacting Organizations |
|--------------------|------------|-----------------------------------------------------------------------------------------------------------------------------------|------------------------|
| Space performance  | 2000/03/01 | Quality standard for residential decoration in Jiangsu (DB32/381-2000)                                                            | BQTS                   |
|                    | 2006/06/01 | Standard for drawings of residential building decoration in Jiangsu (DGJ32/J20-2006)                                              | BOHURD                 |
|                    | 2007/07/01 | Regulations on compiling design documents for residential building decoration in Jiangsu (138-2007)                               | BOHURD                 |
| IEQ                | Thermal    | Nil                                                                                                                               |                        |
|                    | IAQ        | 2012/09/01 Code for indoor environmental quality acceptance of civil building decoration (DGJ32/J140-2012)                        | BOHURD                 |
| Energy efficiency  |            | 2008/04/01 Notice on strengthening building energy saving (17-2008)                                                               | Office of PGJP         |
|                    |            | 2009/01/01 Regulation on building energy saving in Jiangsu (210-2008)                                                             | BOHURD                 |
|                    |            | 2009/12/01 Regulations on building energy saving in Jiangsu (59)                                                                  | PGJP                   |
|                    |            | 2010/12/01 Control specification for the quality of energy-efficiency-project of civil building (DGJ32/TJ106-2010)                | BOHURD                 |
|                    |            | 2011/02/18 Notice on promoting energy performance contracting in construction sector (15-2011)                                    | BOHURD                 |
|                    |            | 2011/12/21 Guideline for implementing building energy efficiency labelling in Jiangsu province (816-2011)                         | BOHURD                 |
|                    |            | 2012/04/01 Standard for energy efficiency evaluation and labeling of civil building (DGJ32/TJ135-2012)                            | BOHURD                 |
|                    |            | 2013/09/01 Standard for civil buildings energy consumption statistics (DJG32/TJ153-2013)                                          | BOHURD                 |
|                    |            | 2013/09/01 Technical specification of data monitoring systems for application of renewable energy in buildings (DJG32/TJ152-2013) | BOHURD                 |
| Water conservation | 2011/04/01 | Technical code for engineering of rain utilization (DGJ32/TJ113-2011)                                                             | BOHURD                 |
| Material saving    | 2008/05/01 | Plastic doors and windows (30-2008)                                                                                               | BOHURD                 |
|                    | 2009/07/01 | Configuration of indoor lighting and decoration (34-2009)                                                                         | BOHURD                 |
|                    | 2009/12/01 | Energy saving aluminum alloy doors and windows (35-2009)                                                                          | BOHURD                 |
|                    | 2012/01/01 | Technical standards for wood decoration products (DJG32/TJ128-2011)                                                               | BOHURD                 |
|                    | 2014/02/01 | Technical specification for external thermal insulation systems based on insulated decorative panel (DGJ32/TJ86-2013)             | BOHURD                 |
| New technologies   | 2009/01/01 | Code for design, installation and acceptance of construction solar water heating system (DGJ/J08-2008)                            | BOHURD                 |

Note: BOHURD: Bureau of Housing and Urban-Rural Development Jiangsu; PGJP: People' Government of Jiangsu Province; Office of PGJP: Office of People' Government of Jiangsu Province; BQTS: Bureau of Quality and Technical Supervision Jiangsu.

**Annex 4.** Code and regulations of relevance to green interior design for residential building in Jiangsu province (2).

|                                                                                                                            | SP | IEQ      |          |         |     | EE | WC | MS | MF | NT |
|----------------------------------------------------------------------------------------------------------------------------|----|----------|----------|---------|-----|----|----|----|----|----|
|                                                                                                                            |    | Acoustic | Lighting | Thermal | IAQ |    |    |    |    |    |
| Design standard for residential building of JiangSu (DGJ32/J 26-2006)                                                      | ✓  | ✓        | ✓        |         | ✓   | ✓  |    |    |    |    |
| Design Standard of Thermo-Environment & Energy Conservation for Residential Buildings in Jiangsu Province (DGJ32/J71-2014) |    |          |          | ✓       |     | ✓  |    |    |    |    |
| Management regulation on developing new wall materials and promoting energy saving buildings                               |    |          |          |         |     | ✓  |    |    | ✓  |    |
| Notice on strengthening the application of energy saving windows and exterior shading devices (269-2008)                   |    |          |          |         |     | ✓  |    |    | ✓  |    |
| Evaluation standard for green building in Jiangsu Province (DGJ32/TJ76-2009)                                               |    | ✓        | ✓        | ✓       | ✓   | ✓  | ✓  | ✓  | ✓  |    |
| Technical guideline for assessment for green building in Jiangsu province (53-2011)                                        |    | ✓        | ✓        | ✓       | ✓   | ✓  | ✓  | ✓  | ✓  |    |
| Jiangsu design standard for green building (DGJ32/J173-2014)                                                               |    | ✓        | ✓        | ✓       | ✓   | ✓  | ✓  | ✓  | ✓  |    |
| Regulations on compiling green design documents for civil building construction in Jiangsu (171-2015)                      |    | ✓        | ✓        | ✓       | ✓   | ✓  | ✓  | ✓  | ✓  |    |
| Checklist for green design for civil building construction in Jiangsu (171-2015)                                           |    | ✓        | ✓        | ✓       | ✓   | ✓  | ✓  | ✓  | ✓  |    |
| Regulations on developing green building in Jiangsu (23)                                                                   |    |          |          |         |     | ✓  | ✓  | ✓  |    | ✓  |

Note: SP: space performance; IEQ: indoor environmental quality; IAQ: indoor air quality; EE: Energy efficiency; WC: water conservation; MS: material saving; MF: material and finishes; NT: new technologies.
